# Supplementary material for: Biodegradable Block Poly(ester amine)s with Pendant Hydroxyl Groups for Biomedical Applications
Source: MDPI journal article supplement (doi:10.3390/polym15061473), 2023-03-16
Supplement: s1 [file s1]

Supplementary Materials

# Biodegradable Block Poly(ester amine)s with Pendant Hydroxyl Groups for Biomedical Applications

Natalia Śmigiel-Gac <sup>1</sup>, Anna Smola-Dmochowska <sup>1</sup>, Henryk Janeczek <sup>1</sup> and Piotr Dobrzyński <sup>1,2,\*</sup>

<sup>1</sup> Centre of Polymer and Carbon Materials, Polish Academy of Sciences, 41-819 Zabrze, Poland

<sup>2</sup> Faculty of Science and Technology, Jan Długosz University in Częstochowa, 13/15 Armii Krajowej Av., 42-200 Częstochowa, Poland

\* Correspondence: p.dobrzynski@ujd.edu.pl

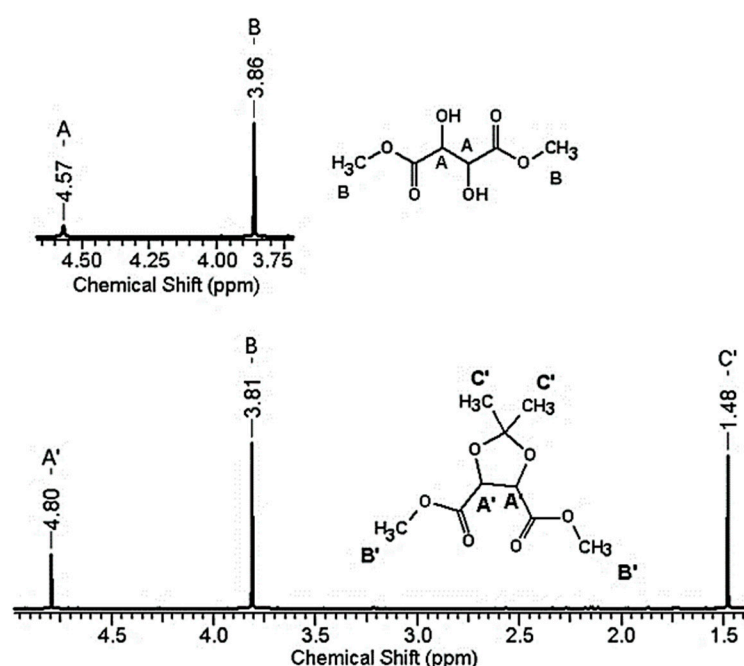

**Figure S1.** <sup>1</sup>H NMR spectrum of dimethyl - L tartrate and dimethyl 2,3-O-isopropylidene - L - tartrate (with protected hydroxyl groups). After protection, there are chemical shifts, signal A -  $\text{CH}_2\text{OH}$ , shift to A' -  $\text{CH}_2\text{OC}$ , B – the signal of methyl groups of the ester  $\text{CH}_3\text{O}$ , and signal C' of the  $-\text{CCH}_3$  groups of the protecting agent.

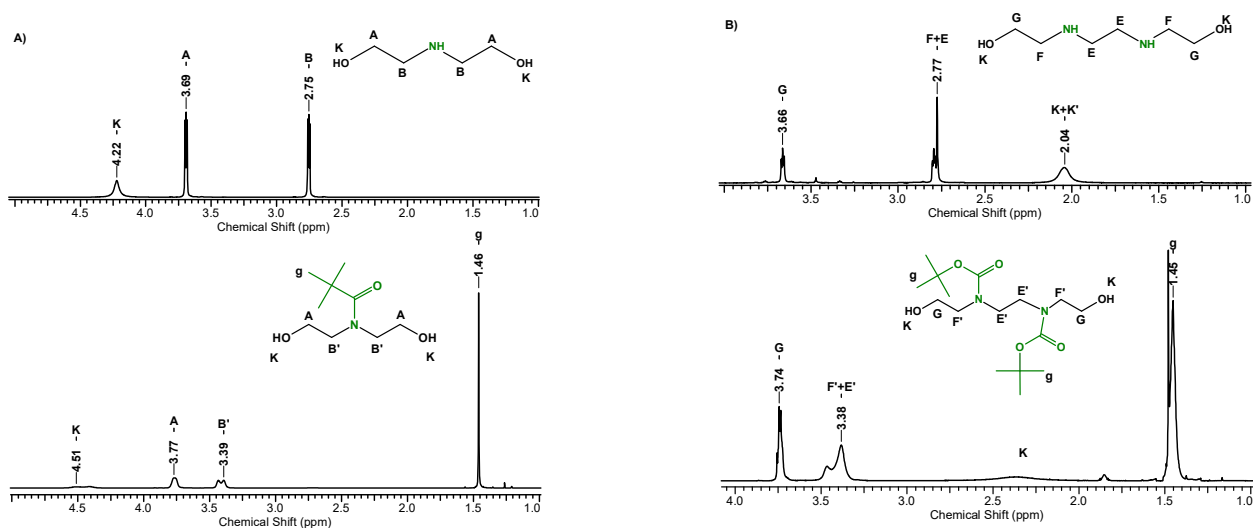

**Figure S2.**  $^1\text{H}$  NMR spectrum, (A) diethanolamine before and after the protection of amine groups (tert-butyl bis(2-hydroxyethyl) carbamate), (B) N,N' – bis (2 hydroxyethyl) ethylenediamine before and after the protection of amino groups.

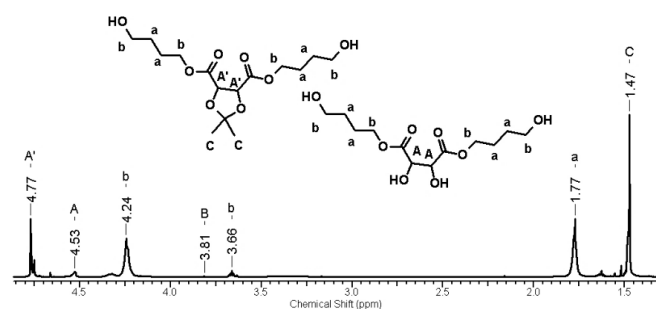

**Figure S3.**  $^1\text{H}$  NMR spectrum of poly(butylene 2,3, - O - isopropylidene - L - tartrate) (Table 1, I1).

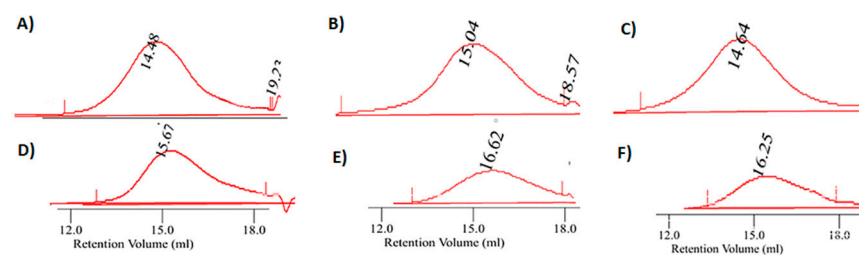

**Figure S4.** GPC elugrams; P6 A) before deprotection of hydroxyl and amine groups, B) after of hydroxyl and amine groups deprotection; P4 C) before deprotection of hydroxyl and amine groups D) after deprotection of hydroxyl and amine groups; P4 E) before deprotection of hydroxyl groups; F) after deprotection of hydroxyl groups.
